CORRECTION

# Correction: Relaxation Response and Resiliency Training and Its Effect on Healthcare Resource Utilization

James E. Stahl, Michelle L. Dossett, A. Scott LaJoie, John W. Denninger, Darshan H. Mehta, Roberta Goldman, Gregory L. Fricchione, Herbert Benson

The Competing Interests statement is incorrect. The correct Competing Interests statement is: The following authors hold or have held positions at the Benson-Henry Institute for Mind Body Medicine at Massachusetts General Hospital, which is paid by patients and their insurers for running the SMART-3RP and related relaxation/mindfulness clinical programs, markets related products such as books, DVDs, CDs and the like, and holds a patent pending (PCT/US2012/049539 filed August 3, 2012) entitled "Quantitative Genomics of the Relaxation Response": JS, MD, JD, DM, RG, GF, HB.

## Reference

1. Stahl JE, Dossett ML, LaJoie AS, Denninger JW, Mehta DH, Goldman R, et al. (2015) Relaxation Response and Resiliency Training and Its Effect on Healthcare Resource Utilization. PLoS ONE 10 (10): e0140212 doi:[10.1371/journal.pone.0140212](https://doi.org/10.1371/journal.pone.0140212) PMID: [26461184](https://pubmed.ncbi.nlm.nih.gov/26461184/)

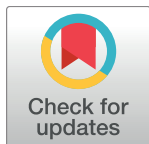

## OPEN ACCESS

**Citation:** Stahl JE, Dossett ML, LaJoie AS, Denninger JW, Mehta DH, Goldman R, et al. (2017) Correction: Relaxation Response and Resiliency Training and Its Effect on Healthcare Resource Utilization. PLoS ONE 12(2): e0172874. doi:[10.1371/journal.pone.0172874](https://doi.org/10.1371/journal.pone.0172874)

**Published:** February 21, 2017

**Copyright:** © 2017 Stahl et al. This is an open access article distributed under the terms of the [Creative Commons Attribution License](https://creativecommons.org/licenses/by/4.0/), which permits unrestricted use, distribution, and reproduction in any medium, provided the original author and source are credited.
